# Supplementary material for: Forecasting national and regional influenza-like illness for the USA
Source: PubMed Central journal article supplement (PMC6557527; doi:10.1371/journal.pcbi.1007013), 2019-05-23

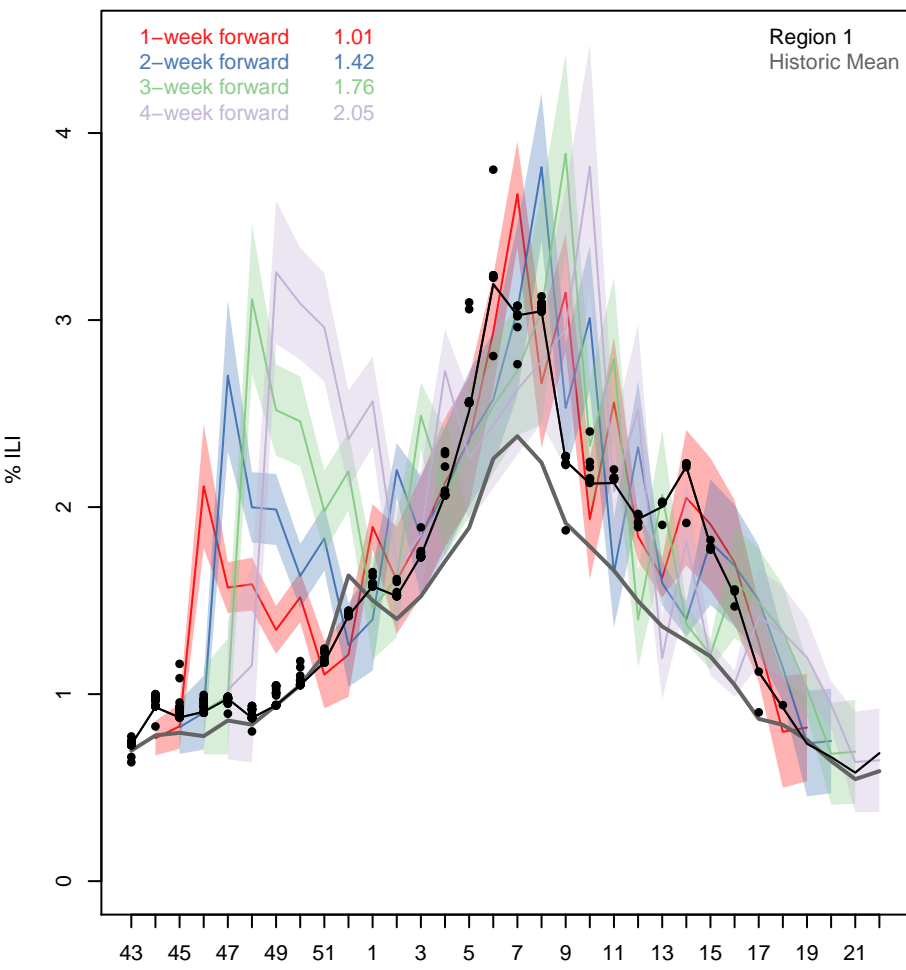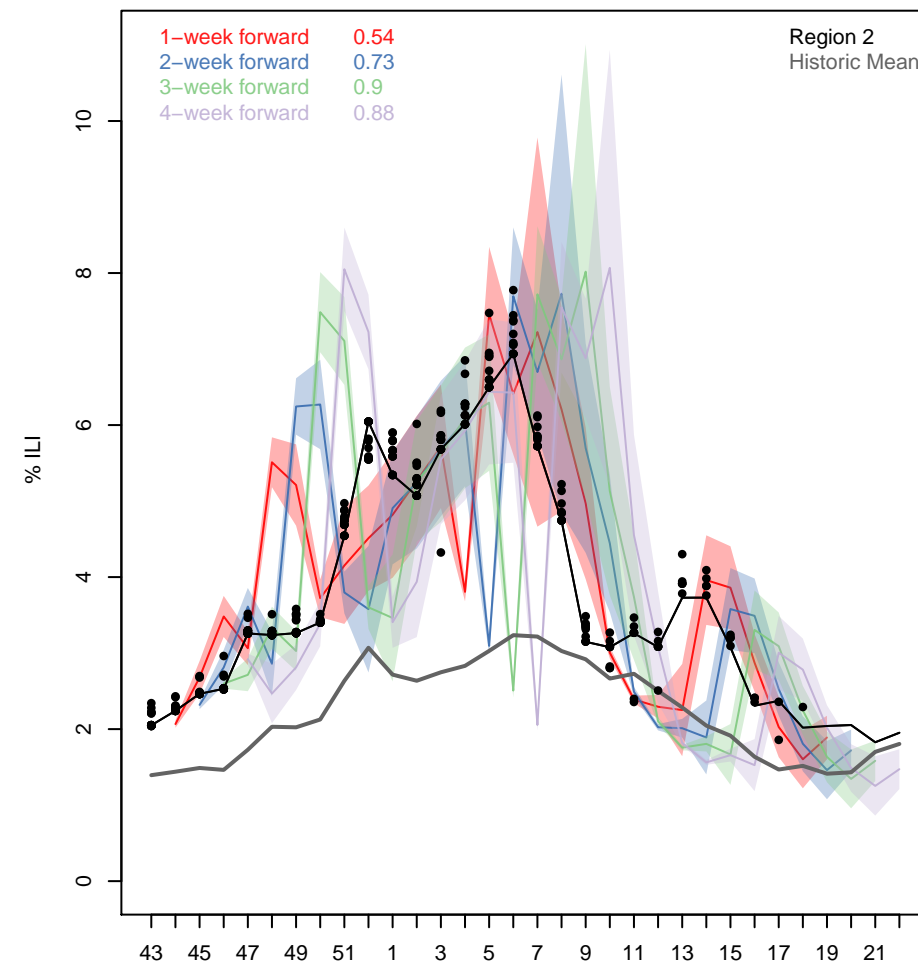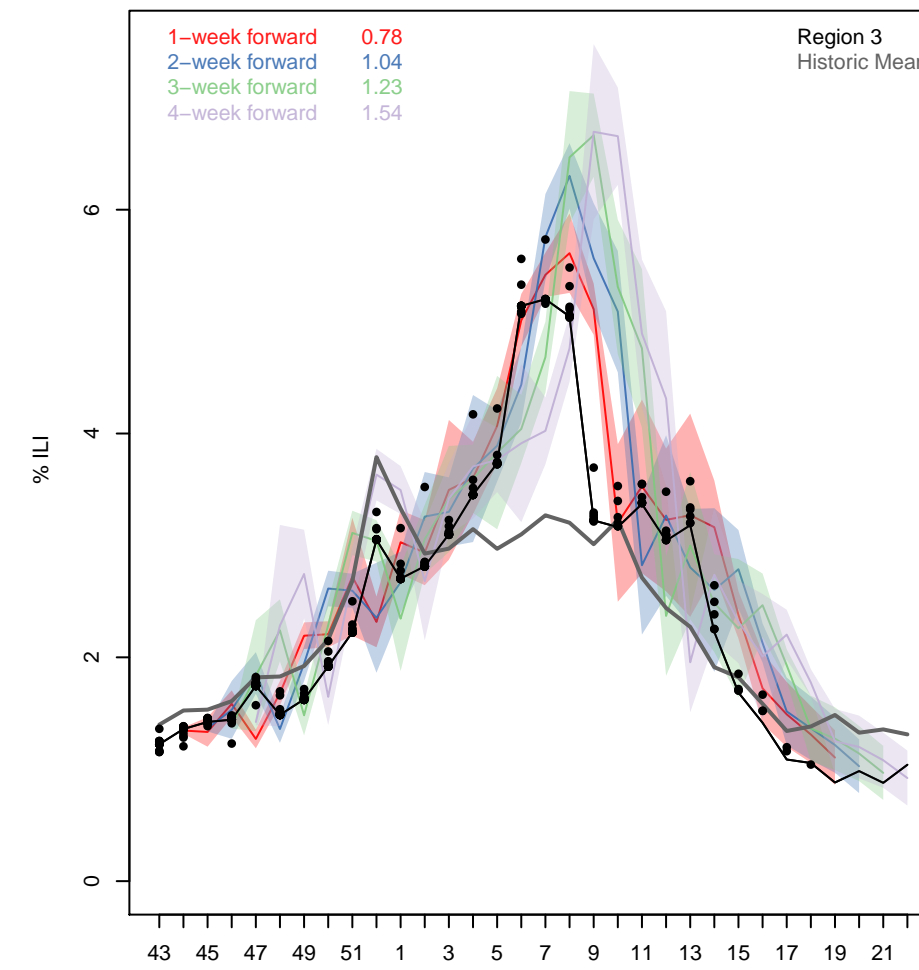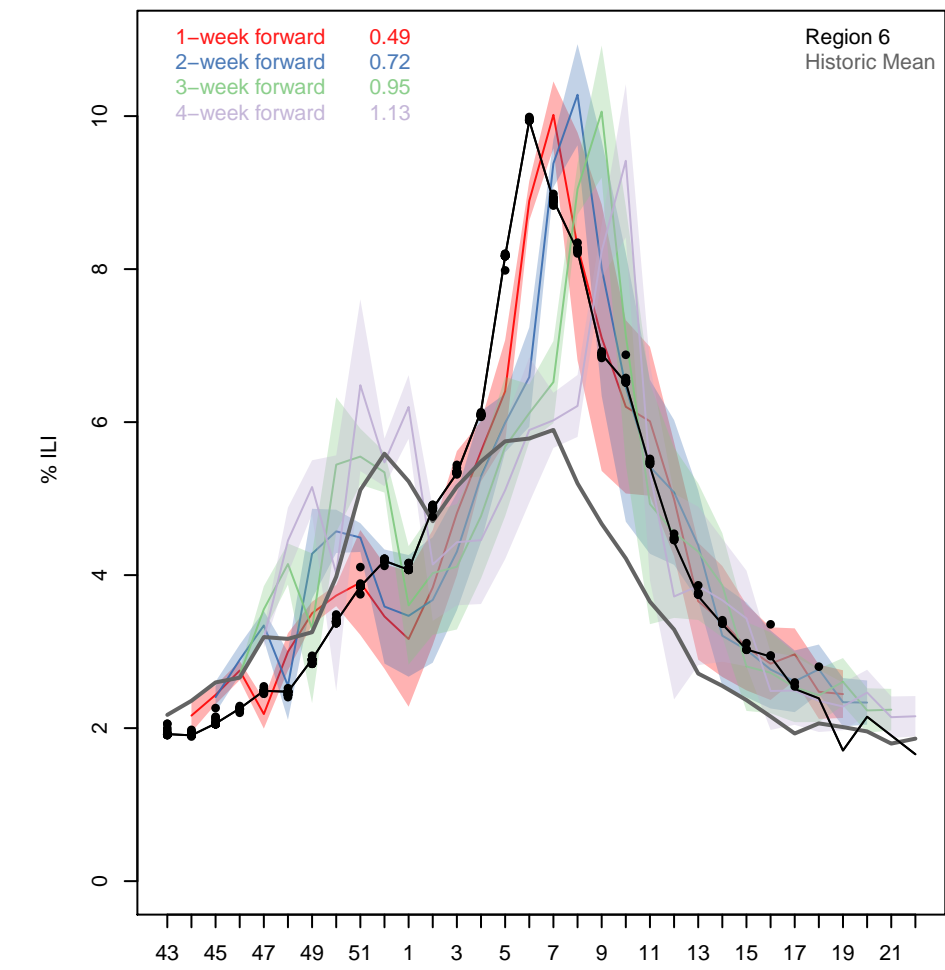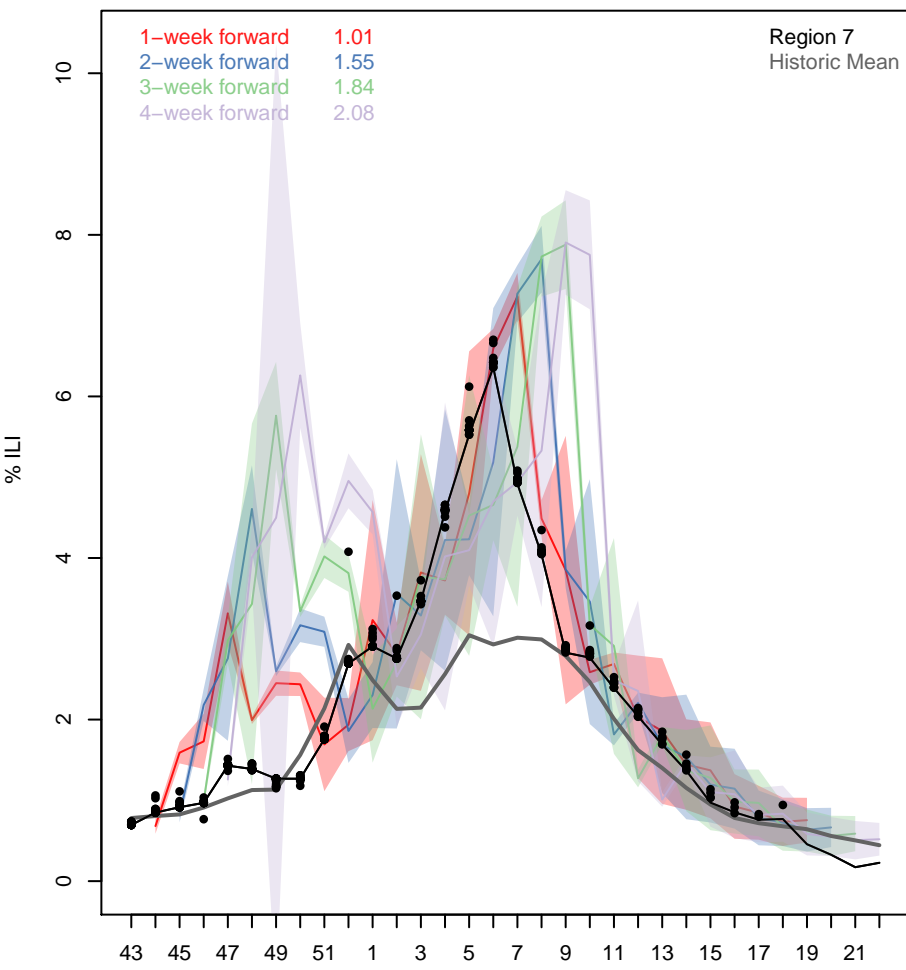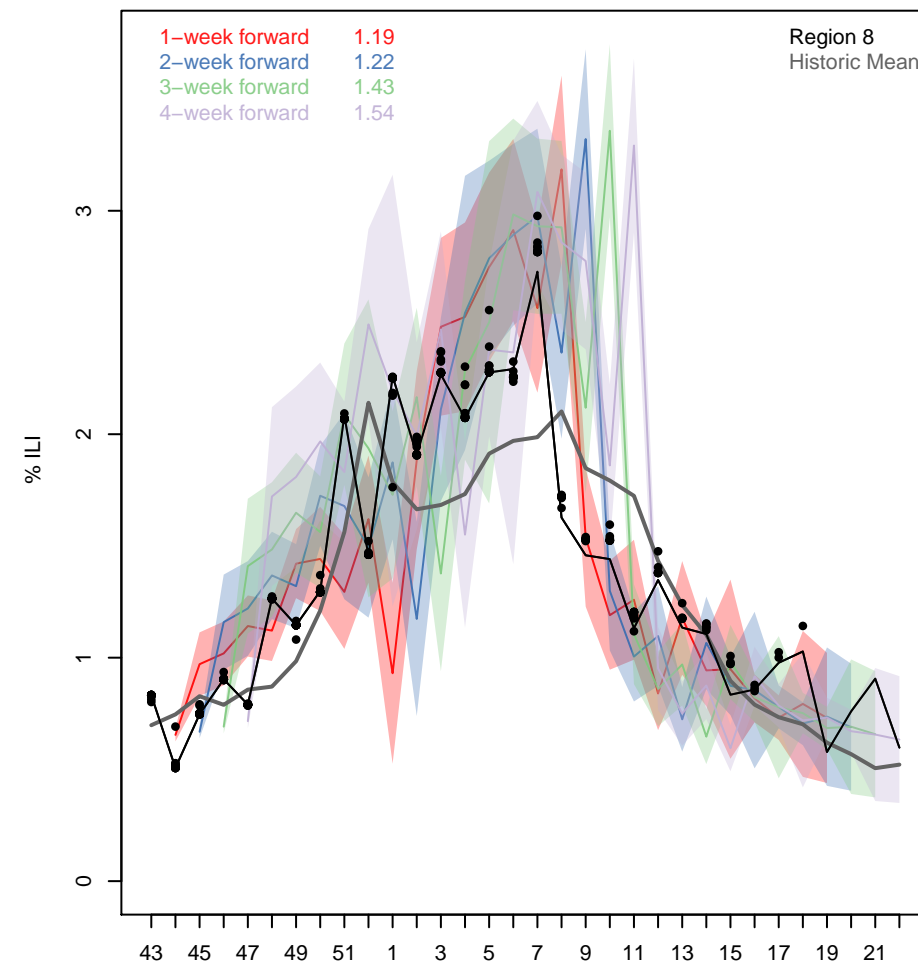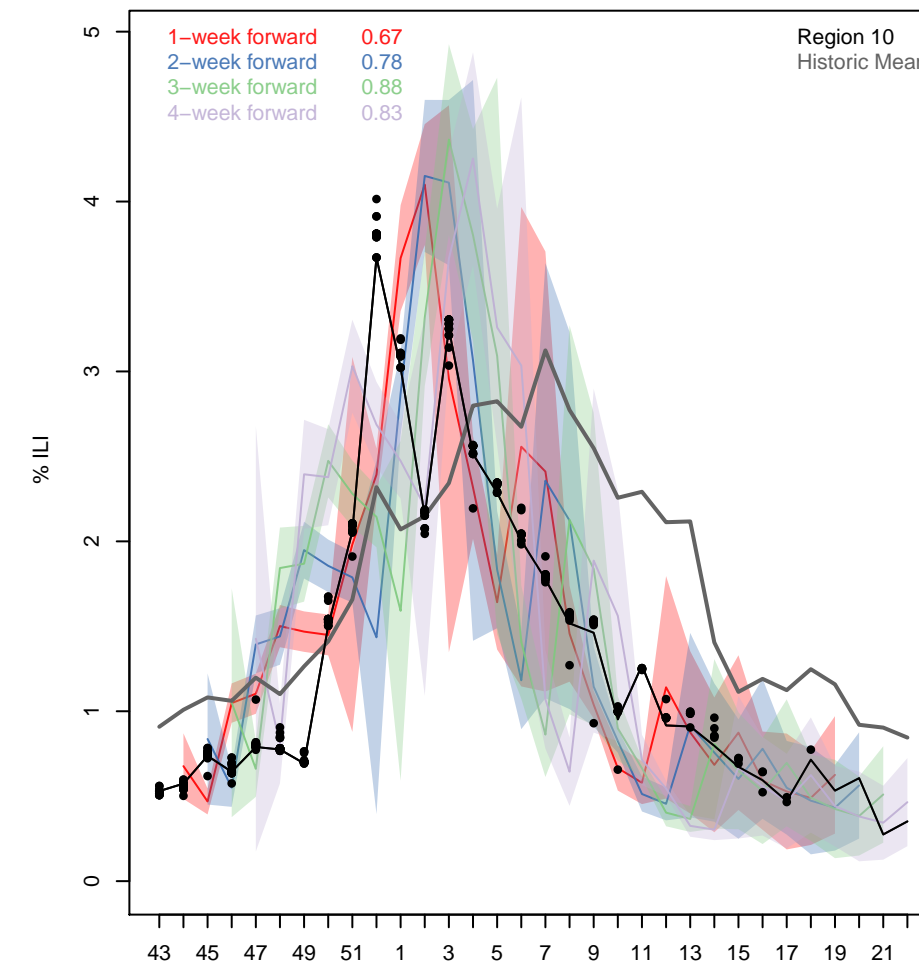

Supplement: pcbi.1007013.s002.pdf [file pcbi.1007013.s002.pdf]
